1 Topoisomerase I Essentiality, DnaA-independent Chromosomal Replication,  
2 and Transcription-Replication Conflict in *Escherichia coli*

3

4 J Krishna Leela<sup>a</sup>, Nalini Raghunathan<sup>a</sup>, and J Gowrishankar<sup>a,b#</sup>

5

6 <sup>a</sup>Laboratory of Bacterial Genetics, Centre for DNA Fingerprinting and  
7 Diagnostics, Hyderabad, India

8 <sup>b</sup>Indian Institute of Science Education and Research Mohali, SAS Nagar, India

9

10 Running Head: Topoisomerase I essentiality in *E. coli*

11

12 #Address correspondence to Dr J Gowrishankar (Orcid ID: 0000-0003-2483-  
13 9209), Tel: +91-172-2240266; Fax: +91-172-2240124; Email:  
14 shankar@iisermohali.ac.in

15

16 Keywords: DNA supercoiling, topoisomerase I, R-loops, constitutive stable  
17 DNA replication, transcription-replication conflict

18

## Abstract

19           Topoisomerase I (Topo I) of *Escherichia coli*, encoded by *topA*, acts to  
20 relax negative supercoils in DNA. Topo I deficiency results in hypernegative  
21 supercoiling, formation of transcription-associated RNA-DNA hybrids (R-  
22 loops), and DnaA- and *oriC*-independent constitutive stable DNA replication  
23 (cSDR), but some uncertainty persists as to whether *topA* is essential for  
24 viability in *E. coli* and related enterobacteria. Here we show that several *topA*  
25 alleles, including  $\Delta topA$ , confer lethality in derivatives of wild-type *E. coli* strain  
26 MG1655. Viability in absence of Topo I was restored with two perturbations,  
27 neither of which reversed the hypernegative supercoiling phenotype: (i) in a  
28 reduced-genome strain MDS42, or (ii) by an RNA polymerase (RNAP) mutation  
29 *rpoB\*35* that has been reported to alleviate the deleterious consequences of  
30 RNAP backtracking and transcription-replication conflicts. Four phenotypes  
31 related to cSDR were identified for *topA* mutants: (i) One of the *topA* alleles  
32 rescued  $\Delta dnaA$  lethality; (ii) in *dnaA*<sup>+</sup> derivatives, Topo I deficiency generated  
33 a characteristic copy number peak in the terminus region of the chromosome;  
34 (iii) *topA* was synthetically lethal with *rnhA* (encoding RNase HI, whose  
35 deficiency also confers cSDR); and (iv) *topA rnhA* synthetic lethality was itself  
36 rescued by  $\Delta dnaA$ . We propose that the terminal lethal consequence of  
37 hypernegative DNA supercoiling in *E. coli topA* mutants is RNAP backtracking  
38 during transcription elongation and associated R-loop formation, which in  
39 turn lead to transcription-replication conflicts and to cSDR.

40

41

## Importance

42           In all life forms, double helical DNA exists in a topologically supercoiled  
43 state. The enzymes DNA gyrase and topoisomerase I act, respectively, to  
44 introduce and to relax negative DNA supercoils in *Escherichia coli*. That gyrase  
45 deficiency leads to bacterial death is well established, but the essentiality of  
46 topoisomerase I for viability has been less certain. This study confirms that  
47 topoisomerase I is essential for *E. coli* viability, and suggests that in its  
48 absence aberrant chromosomal DNA replication and excessive transcription-  
49 replication conflicts occur that are responsible for lethality.

50

51

## Introduction

52 DNA in all cells is negatively supercoiled, and in bacteria such as  
53 *Escherichia coli* two enzymes gyrase and topoisomerase I (Topo I) ordinarily  
54 act oppositely to maintain the homeostasis of DNA superhelical density  
55 (reviewed in 1–4). DNA gyrase is a hetero-tetrameric enzyme (comprised of two  
56 subunits each of GyrA and GyrB proteins) that is ATP-dependent and  
57 introduces negative supercoils, whereas Topo I (encoded by *topA*) is an 865  
58 amino acid-long monomer that catalyzes relaxation of supercoiled DNA in an  
59 energy-independent reaction. An important role for Topo I is in the dissipation  
60 of negative supercoils, in accord with the twin-domain supercoiling model (5,  
61 6), that are generated behind RNA polymerase (RNAP) in the transcription  
62 elongation complex (TEC).

63 That gyrase deficiency leads to bacterial death is well established. On  
64 the other hand, the essentiality of Topo I for viability, in either *E. coli* or closely  
65 related bacteria such as *Salmonella enterica* and *Shigella flexneri*, is somewhat  
66 less certain (7–13). One difficulty has been that *topA* mutants rapidly  
67 accumulate suppressors which are often in the genes encoding the gyrase  
68 subunits (8–10, 13–17); and consistent with their opposing actions, gyrase  
69 and Topo I mutations can, in combination, partially cancel one another's  
70 sickness or inviability (18, 19). Growth of *E. coli topA* mutants is also improved  
71 upon overexpression or amplification of genes encoding the topoisomerases  
72 III (13, 18, 20) or –IV (10, 16, 19).

73 Topo I deficiency is associated with an increased prevalence of R-loops  
74 (RNA-DNA hybrids) in the cells, which has been attributed to re-annealing of  
75 the 5'-end of nascent RNA into hyper-negatively supercoiled DNA behind the  
76 TEC under these conditions (21–23, reviewed in 4, 24, 25). Overexpression of  
77 RNase HI (encoded by *rnhA*), which degrades RNA in RNA-DNA hybrids, can  
78 alleviate some of the phenotypes of *topA* mutants (18, 22, 23, 26–28); and  
79 conversely, *topA rnhA* mutants exhibit exacerbated sickness (13, 26, 29). In  
80 principle, R-loops can exert toxicity by acting as road-blocks to subsequent  
81 transcription (30, 31) and to replication (32–34); and a third mechanism for  
82 toxicity is by serving as sites for initiation of aberrant chromosomal

83 replication, as further outlined below. That R-loop formation is modulated by  
84 DNA supercoiling has been shown also in the CRISPR-Cas9 system (35), and  
85 in eukaryotic cells (36–38).

86 Recent evidence indicates that transcription-replication conflicts can  
87 themselves lead to increased formation of R-loops in the genome following  
88 RNAP backtracking at the sites of conflict (39–42, reviewed in 43–45). It has  
89 also been suggested that extended RNAP backtracking could be associated  
90 with R-loop formation from the 3'-end of the nascent RNA (40, 46).

91 R-loops are physiological initiators of ColE1 plasmid replication (47),  
92 but in addition their excessive occurrence (as in *mhA* mutants) can lead to  
93 pathological initiation of chromosomal DNA replication in both bacteria  
94 (reviewed in 48–50) and eukaryotes (51). Such aberrant replication in bacteria  
95 is referred to as constitutive stable DNA replication (cSDR) since, unlike  
96 ordinary chromosomal replication which is initiated at *oriC* with the aid of the  
97 unstable protein DnaA, it continues long after inhibition of protein synthesis  
98 in the cells. cSDR can be identified biochemically as persistent DNA synthesis  
99 following addition of translational inhibitors such as chloramphenicol or  
100 spectinomycin.

101 cSDR can also be identified genetically as rescue of lethality associated  
102 with loss of DnaA function, which is a more stringent test of cSDR since it  
103 demonstrates the capability to duplicate the entire chromosome in the  
104 absence of *oriC*-initiated replication (48, 49). During its progression around  
105 the bacterial chromosome, such aberrant replication would be expected also  
106 to encounter (i) increased head-on conflicts with TECs on heavily transcribed  
107 genes (especially the *rm* operons) that have evolved to be co-directional with  
108 *oriC*-initiated replisome progression, and (ii) increased arrest at *Ter* sites  
109 flanking the terminus region which are bound by the Tus protein (52, 53). The  
110 occurrence of cSDR in *mhA* mutants has been established through both the  
111 biochemical and the genetic assays (48). The protein DksA, which participates  
112 in avoidance or resolution of transcription-replication conflicts (54, 55), is also  
113 required for viability of *mhA dnaA* mutants (56).

114 In recent work, Drolet's group has shown by the biochemical assays  
115 that cSDR occurs in Topo I-deficient cells (28). Kornberg and coworkers had  
116 also shown earlier that specificity for replication initiation from *oriC* *in vitro*  
117 requires both RNase HI and Topo I (57, 58).

118 In this study, we have examined several *topA* insertion and deletion  
119 alleles for both their viability and their ability to rescue  $\Delta dnaA$  lethality in *E.*  
120 *coli*. Our results indicate that *topA* null alleles are lethal in the wild-type strain  
121 MG1655 but that they are viable in MDS42, which is an engineered derivative  
122 lacking all prophages and transposable elements (59). The null mutants of  
123 MG1655 were viable with *rpoB*\*35, which encodes an RNAP variant that has  
124 been reported to alleviate the deleterious effects of transcription-replication  
125 conflicts(40, 52, 60–65). Both in MDS42 and with *rpoB*\*35, the viable Topo I-  
126 deficient derivatives continued to exhibit increased negative supercoiling. One  
127 *topA* allele could also rescue  $\Delta dnaA$  lethality, providing genetic confirmation  
128 of cSDR in Topo I-deficient strains. We propose that bacterial lethality in  
129 absence of Topo I is caused by RNAP backtracking during transcription  
130 elongation and associated R-loop formation, which in turn then lead to  
131 transcription-replication conflicts and to cSDR.

## 132 **Results**

133 **Description of *topA* insertion and deletion mutations and the assay to**  
134 **test for their viability.** Three pairs of *topA* mutations were constructed on  
135 the *E. coli* chromosome by the recombineering approach of Datsenko and  
136 Wanner (66), each pair comprised of an FRT-flanked Kan<sup>R</sup> element and the  
137 corresponding derivative with Flp recombinase-mediated site-specific excision  
138 of the Kan<sup>R</sup> element to leave behind a “scar” of 27 in-frame codons; these are  
139 designated below by the suffixes “::Kan” and “::FRT”, respectively.

140 The three pairs of mutations represent the following (Fig. 1A): (i) deletion  
141 of all but the first codon and the last six codons (860-865) of the *topA* open-  
142 reading frame ( $\Delta topA$ ), that is, similar to the various gene knock-outs of the  
143 Keio collection (67); (ii) insertion beyond codon 480 in *topA* (*topA*-Ins480), this  
144 position being chosen because an earlier study had shown that a Tet<sup>R</sup>

145 insertion allele at this site was viable and associated with increased frequency  
146 of transposon precise excisions (11); and (iii) deletion beyond codon 480 until  
147 codon 860 in *topA* (*topA*-480 $\Delta$ ).

148 All the *topA* mutations were constructed and maintained in derivatives  
149 that were also  $\Delta$ *lacZ* on the chromosome and carried a shelter plasmid  
150 derivative of a single-copy-number IncW replicon encoding trimethoprim (Tp)-  
151 resistance (68) with *topA*<sup>+</sup> and *lacZ*<sup>+</sup> genes. Since this plasmid's segregation  
152 into daughter cells during cell division is not tightly controlled, around 10%  
153 of cells in a population are plasmid-free. Only provided that these latter cells  
154 are viable, they grow as white colonies on Tp-free medium supplemented with  
155 Xgal, whereas the plasmid-bearing cells grow as blue colonies on these plates.  
156 The appearance of white colonies which can be subsequently purified,  
157 therefore, is a demonstration of viability in absence of the *topA*<sup>+</sup> shelter  
158 plasmid, and we have employed the similar blue-white screening assays  
159 earlier for tests of viability with other essential genes such as *rho*, *nusG*, *dnaA*,  
160 and *rne* (69–71).

161 **Viability of *topA* mutations in MDS42 and MG1655 *rpoB*\*35.** With the  
162 blue-white assay above, we found that none of the six *topA* alleles is viable in  
163 MG1655 (Fig. 1B). These observations are consistent with those of Stockum  
164 et al. (13) who also employed a similar approach to conclude that *topA* is  
165 essential in *E. coli*.

166 By the same blue-white assay, we could show that all the *topA*  
167 mutations are viable in strain MDS42 and in *rpoB*\*35 derivatives of both  
168 MG1655 and MDS42, on both LB and defined media (Fig. 1B and Supp. Fig.  
169 S1A); the growth of white colonies of the MDS42 *topA* derivatives was  
170 improved in presence of *rpoB*\*35, on both media (Supp. Fig. S1B). MDS42 is  
171 a derivative of MG1655 with 14% of its genome (comprising all prophages and  
172 transposable elements) deleted (59), while *rpoB*\*35 is a mutation in RNAP that  
173 has been reported to render the enzyme less prone to backtracking or arrest  
174 and more accommodative of conflicts with replication (40, 52, 60–65).

175 In microscopy experiments (Supp. Fig. S2), cell size and morphology

176 were unchanged with the *rpoB\*35* mutation alone in both MG1655 and  
177 MDS42. Cells of the MDS42 *topA* mutant were filamented, and the  
178 filamentation was to a large extent suppressed in the *topA rpoB\*35* derivative.  
179 The *topA rpoB\*35* derivative of MG1655 was also moderately filamented.

180 Growth rate experiments in liquid cultures did not yield reliable data  
181 because of extended lag times and accumulation of suppressors in the *topA*  
182 derivatives. Suppressor accumulation has also been documented earlier for  
183 *topA* mutants by other workers (8, 13). Based on the observation that the  
184 "white" *topA* mutant clones in the blue-white screening assay grow to colonies  
185 of around  $10^8$  cells in 48 hours, we have estimated a doubling time of around  
186 100 min.

187 For reasons that are explained in the Discussion, we tested whether  
188 suppression of *topA* lethality by *rpoB\*35* in MG1655 is abolished in absence  
189 of the UvrD DNA helicase in the cells. In the blue-white assay, viable colonies  
190 of MG1655 *rpoB\*35 topA* were obtained even in a  $\Delta uvrD$  background,  
191 indicating that the suppression is UvrD-independent (Supp. Fig. S3A).

192 **Rescue of *topA* lethality in MDS42 or by *rpoB\*35* is not because of**  
193 **reversal of hypernegative supercoiling.** Lethality caused by loss of Topo I is  
194 associated with greatly elevated levels of negative supercoiling *in vivo*, and at  
195 least some suppressors of inviability, such as mutations in *gyrA* or *gyrB* and  
196 overexpression or amplification of genes encoding topoisomerases III or -IV,  
197 also confer reversal of the hypernegative supercoiling phenotype. To examine  
198 whether the viability of *topA* null mutants in MDS42 and with *rpoB\*35* is  
199 correlated with reversal of hypernegative supercoiling, we determined their  
200 supercoiling status, by chloroquine-agarose gel electrophoresis (21, 72) of a  
201 reporter plasmid pACYC184 (73) in preparations made from the different  
202 strain derivatives.

203 The results, shown in Figure 2, indicate that (i) in MDS42, both *topA*  
204 mutations tested confer increased supercoiling (compare lanes 3-6 with lanes  
205 1-2); (ii) *rpoB\*35* does not alter supercoiling, in both the *topA*<sup>+</sup> (compare within  
206 lane pairs 1 and 2, or 8 and 9) and *topA* derivatives (compare within lane pairs



207 3 and 4, or 5 and 6); and (iii) supercoiling levels are not different between the  
208 strain backgrounds of MG1655 and MDS42 for both *rpoB*<sup>+</sup> (compare lanes 1  
209 and 8) and the *rpoB*\*35 mutant (compare lanes 2 and 9). We conclude that  
210 when lethality conferred by loss of Topo I is suppressed by either genome-size  
211 reduction in MDS42 or *rpoB*\*35, or by both perturbations together, there is  
212 no concomitant reduction in the hypernegative supercoiling status of DNA in  
213 these mutants.

214 ***topA* lethality in MG1655 is not rescued by ectopic expression of the R-**  
215 **loop helicase UvsW.** Ectopic expression of the phage T4-encoded R-loop  
216 helicase UvsW (74) has previously been shown to rescue lethality associated  
217 with increased R-loop prevalence in several different *E. coli* mutants. The  
218 latter include strains with combined deficiency of RNases HI and HII (69), or  
219 of RNase HI and RecG (75), as also those with deletions of genes *rho* or *nusG*  
220 involved in factor-dependent transcription termination (69).

221 Since Topo I deficiency phenotypes are also associated with increased  
222 occurrence of intracellular R-loops and are partially suppressed by RNase HI  
223 overexpression (18, 21–23, 26–28), we employed the blue-white assays to  
224 examine whether UvsW expression (from a *P<sub>tac</sub>*-UvsW chromosomal construct,  
225 induced with IPTG) could rescue MG1655 *topA* lethality; an MG1655  $\Delta$ *rho*  
226 derivative (whose lethality is known to be rescued by UvsW) was chosen as  
227 control. The results indicate that UvsW expression does not confer viability to  
228 the MG1655 *topA* derivative, whereas it could do so to the  $\Delta$ *rho* mutant (Supp.  
229 Fig. S3B). UvsW expression was associated with impaired growth of the *topA*<sup>+</sup>  
230 blue colonies; this growth impairment was exemplified both by a marked  
231 decrease in plating efficiency and by occurrence of blue haloes around the  
232 colonies, suggestive of cell lysis. That UvsW expression is toxic to wild-type *E.*  
233 *coli* has been reported earlier (69).

234 **Rescue of  $\Delta$ *dnaA* lethality by Topo I deficiency.** As mentioned above, Topo  
235 I deficiency was earlier shown by a biochemical assay to confer cSDR, but  
236 whether it can rescue lethality associated with loss of DnaA function (that is,  
237 the genetic assay for cSDR) has not been determined. We adapted the blue-  
238 white assay to test whether any of the *topA* mutations can rescue lethality

239 associated with loss of DnaA function, by constructing a  $Tp^R$  *lacZ*<sup>+</sup> shelter  
240 plasmid that carried both *topA*<sup>+</sup> and *dnaA*<sup>+</sup>. Three different *dnaA* alleles were  
241 used in these experiments:  $\Delta$ *dnaA*::Kan (70), which is a Keio-style insertion-  
242 deletion that has removed all but the first codon and the last six codons of  
243 the 468-codon-long *dnaA* ORF; its FRT derivative,  $\Delta$ *dnaA*::FRT (70); and  
244 *dnaA177* (76), whose DNA sequence determination revealed that it carries  
245 both a missense mutation in codon 267 (resulting in Thr-to-Ilv substitution)  
246 and an amber nonsense mutation in codon 450. The strains also carried  $\Delta$ *tus*  
247 and *rpoB*\*35 mutations, which facilitate cSDR-directed chromosome  
248 duplication by overcoming the problems posed, respectively, by the *Ter* sites  
249 and by excessive head-on transcription-replication conflicts (52, 70, 77, 78).

250 Of the six *topA* mutations tested that had been shown above to be lethal  
251 in MG1655, one (*topA*-Ins480::FRT) was able to rescue lethality of  $\Delta$ *dnaA*::FRT  
252 and of *dnaA177* at 30° on both minimal and LB media (Fig. 3A-B and Supp.  
253 Fig. S4A), while the others yielded no viable white colonies (Fig. 3A). Even with  
254 *topA*-Ins480::FRT, there was no rescue imposed by DnaA deficiency at 37° or  
255 42° (Fig. 3B, see also row 5 in each of the panels of Supp. Fig. S5), nor were  
256 viable colonies recovered with the  $\Delta$ *dnaA*::Kan allele (Fig. 3A). On the other  
257 hand,  $\Delta$ *dnaA*::Kan lethality is rescued by other cSDR-provoking mutations  
258 such as *rnhA* or *dam* (data not shown).

259 Two distinct and interesting interpretations are suggested from these  
260 data: (i) that unlike the other five *topA* alleles, *topA*-Ins480::FRT might possess  
261 a low level of DNA relaxation activity (since it encodes a full-length polypeptide  
262 with just a 27-amino acid linker inserted between residues 480 and 481 of  
263 Topo I) which is not sufficient for viability *per se* in MG1655 but nonetheless  
264 is necessary for viability in the derivatives whose sole source of chromosome  
265 duplication is cSDR; and (ii) that expression of the essential *dnaN* gene  
266 immediately downstream of, and in the same operon as, *dnaA* is achieved  
267 from a fortuitous outward reading promoter in the Kan<sup>R</sup> element of the  
268  $\Delta$ *dnaA*::Kan allele, but that this promoter is rendered inactive under TopoI-  
269 deficient conditions.

270 Notwithstanding these unusual features, our data clearly establish that

271 cSDR in a Topo I-deficient derivative can act to rescue the lethality associated  
272 with total absence of DnaA in the cells. This viability is contingent on absence  
273 of the Tus protein (Supp. Fig. S4B). On the other hand, the DinG helicase,  
274 which has been shown to be needed for  $\Delta dnaA$  viability of RecG- or Dam-  
275 deficient cells (70), was not so required in the Topo I-deficient strain, nor did  
276 its absence impede viability of the *topA* mutant in the *dnaA*<sup>+</sup> derivative (Supp.  
277 Fig. S4C).

### 278 **Copy number analysis of different chromosomal regions in *topA* mutants.**

279 In an exponentially growing population of bacterial cells, DnaA-initiated  
280 replication imposes a bidirectional gradient of copy number for different  
281 regions of the circular chromosome, with the peak near *oriC* and trough in the  
282 terminus region (53). If a *dnaA*<sup>+</sup> strain also suffers a perturbation that  
283 activates cSDR (such as deficiency of RNase HI, RecG, Dam, or multiple DNA  
284 exonucleases), the DNA copy number pattern is characterized by  
285 superposition of a "mid-terminus peak" on the bidirectional gradient  
286 described above (52, 70, 77–82). We have earlier proposed that the mid-  
287 terminus peak represents a population aggregate of replication forks  
288 progressing from stochastically firing cSDR origins that are widely distributed  
289 across the genome (53, 70), although other groups have suggested that it  
290 represents a discrete origin of replication (52, 77–79), or occurrence of over-  
291 replication when oppositely directed forks converge at the terminus (80, 81).

292 Drolet and coworkers have shown earlier that Topo I-deficient mutants  
293 exhibit the mid-terminus peak (19), but their strains also carried additional  
294 genetic changes such as a *gyrB* (Ts) mutation and amplification of the genes  
295 encoding subunits of topoisomerase IV. For our DNA copy number analysis  
296 studies, we used *dnaA*<sup>+</sup> strains of the MDS42 background without or with  
297 *rpoB*\*35 and additionally with the *topA*-Ins480::FRT mutation (that is, the  
298 allele associated with rescue of  $\Delta dnaA$  inviability).

299 The whole genome sequence reads obtained from each of the strains  
300 were aligned to the MDS42 reference sequence, and normalized read counts  
301 for the different chromosomal regions were determined. No suppressor  
302 mutation in any of the candidate genes was identified in the *topA* mutants,

303 while presence of the *topA* mutation itself and of the CAC-to-CAA codon  
304 change (His-to-Gln substitution) associated with the *rpoB\*35* allele (60) was  
305 confirmed in each of the relevant strains.

306 The parental (*topA*<sup>+</sup> *rpoB*<sup>+</sup>) strain exhibited the expected bidirectional  
307 copy number gradient from *oriC* to *Ter* (Fig. 4, panel i), which was also largely  
308 preserved in its *rpoB\*35* derivative (Fig. 4, panel ii). The *topA* mutant  
309 derivatives of both these strains showed distinct mid-terminus peaks  
310 superimposed on the *oriC*-to-*Ter* gradient (Fig. 4, panels iii and iv,  
311 respectively).

312 These results therefore confirm that a *topA* mutation capable of  
313 conferring  $\Delta$ *dnaA* viability is associated with a mid-terminus peak of DNA copy  
314 number in *dnaA*<sup>+</sup> derivatives.

315 **Mutual suppression between lethal mutations: loss of DnaA suppresses**  
316 ***topA-rnhA* synthetic lethality.** Deficiency of either Topo I or RNase HI is  
317 associated with cSDR, and Stockum et al. (13) as well as Drolet and coworkers  
318 (26, 29) have earlier reported lethality or aggravated sickness in the double-  
319 deficient strains. We too found in this study that introduction of the *rnhA*  
320 mutation into otherwise viable *topA* derivatives (that is, in the MG1655-  
321 derived strain with *rpoB\*35* and  $\Delta$ *tus* mutations) confers synthetic lethality;  
322 the two *topA* alleles tested were the FRT derivatives of *topA*-Ins480 and  $\Delta$ *topA*  
323 (Fig. 5, compare panels i-ii for former, and iv-v for latter). The lethalties were  
324 rescued in presence of  $\Delta$ *dnaA* (Fig. 5, panels iii and vi, respectively), indicating  
325 that two otherwise lethal mutant combinations (*topA rnhA* and *dnaA*) could  
326 mutually suppress one another. Robust viability of the triple mutants was  
327 observed on both rich and defined media at 30° and 37°, less so at 42° (Supp.  
328 Fig. S5).

329 We performed PCR experiments to confirm that the chromosomal *topA*  
330 locus in each of the viable triple mutant *topA rnhA dnaA* derivatives was  
331 indeed disrupted (and had not, for example, become *topA*<sup>+</sup> by gene conversion  
332 from the wild-type allele on the shelter plasmid). Two primer pairs were used  
333 simultaneously to distinguish between the *topA*<sup>+</sup>,  $\Delta$ *topA*::FRT, and *topA*-

334 Ins480::FRT alleles, that yielded amplicons of 500, 328, and 581 bp,  
335 respectively (Supp. Fig. S6A-B). The results established that the signatures  
336 for the *topA*-Ins480 and  $\Delta topA$  mutations were present, and that for *topA*<sup>+</sup> was  
337 absent, in the triple mutant strains (Supp. Fig. S6B, lanes 5 and 7,  
338 respectively).

339 As discussed below, these results suggest that it is excessive  
340 chromosomal replication which kills cells doubly defective for Topo I and  
341 RNase HI.

## 342 Discussion

343 The enzymes Topo I and DNA gyrase act to maintain the homeostatic  
344 balance of DNA negative supercoiling in *E. coli*. Topo I relaxes negative  
345 supercoils, especially those occurring behind RNAP during transcription  
346 elongation, and thus prevents the nascent transcript from re-annealing with  
347 the template DNA strand to form R-loops.

348 In this study, we have confirmed that Topo I-deficient *E. coli* mutants  
349 are inviable, and furthermore have identified two novel means by which the  
350 lethality can be independently and additively suppressed: (i) by deletion of the  
351 non-essential 14% of the genome comprising prophages and transposable  
352 elements, as in the strain MDS42; and (ii) by the *rpoB*\*35 mutation encoding  
353 an altered RNAP which has earlier been variously described (not mutually  
354 exclusive) to mimic the transcriptional effects of ppGpp (60), to reduce RNAP  
355 backtracking (40), and to mitigate the effects of transcription-replication  
356 conflicts by destabilizing the TEC (40, 52, 62, 63, 65). Neither of the  
357 suppressors acts by reversing hypernegative supercoiling in the *topA*  
358 mutants. We have also shown that Topo I deficiency, in the presence of  
359 additional *rpoB*\*35 and  $\Delta tus$  mutations, can rescue  $\Delta dnaA$  lethality, thereby  
360 providing genetic confirmation for occurrence of cSDR in the Topo I-deficient  
361 derivatives.

362 ***rpoB*\*35 and RNAP backtracking.** As mentioned above, several workers have  
363 provided evidence that the *rpoB*\*35-encoded substitution in RNAP destabilizes  
364 the TEC in vitro (40, 62) and protects against transcription-replication

365 conflicts in vivo (65), including during cSDR (52, 70, 77, 78). Trautinger and  
366 Lloyd (61) have reported that *rpoB\*35* suppresses the Ts phenotype of *greA*  
367 *greB* double mutants and the UV-sensitivity of an *mfd* mutant, which they  
368 interpret as evidence that it may function by preventing backtracking, thus  
369 facilitating dissociation of stalled TECs. Likewise, *rpoB\*35* also suppresses *rep*  
370 *uvrD* lethality, which has been ascribed to direct reduction of replicative  
371 barriers posed by TECs under these conditions (63).

372 On the other hand, there is one report from the Nudler group that  
373 RpoB\*35-substituted RNAP exhibits increased backtracking in vitro in  
374 presence of UvrD (64). This property of RpoB\*35-RNAP appears to be strictly  
375 UvrD-dependent, and the same group has shown in other studies (40) that  
376 relative to wild-type RNAP, the RpoB\*35 enzyme is resistant to pausing and  
377 backtracking.

378 It is therefore reasonable to conclude that the RpoB\*35 enzyme is in  
379 general more resistant than wild-type RNAP to arrest and backtracking during  
380 transcription elongation, except perhaps in the specific context when a high  
381 concentration of UvrD dimers occurs following DNA damage. Our finding in  
382 this study, that the suppression of *topA* lethality by *rpoB\*35* is UvrD-  
383 independent (Supp. Fig. S3A), is noteworthy in this context.

384 **Mechanism of lethality in Topo I-deficient strains.** The fact that *rpoB\*35*  
385 restores growth to MG1655 in absence of Topo I without affecting the  
386 hypernegative supercoiling status of the mutants suggests that it is the  
387 downstream consequences of increased negative supercoiling, namely RNAP  
388 backtracking and impairment of TEC progression leading to transcription-  
389 replication conflicts, which are responsible for *topA* lethality. Pathological R-  
390 loop formation is also expected to be an important feature at the arrested  
391 TECs, but whether it precedes or follows RNAP backtracking remains to be  
392 determined. In the *topA* mutant, *rpoB\*35* would also relieve the sickness  
393 during cSDR engendered by transcription-replication conflicts especially at  
394 the *rm* operons.

395 To explain *topA* viability in MDS42, we propose that the regions of the  
396 genome that are deleted in this strain (comprising prophages and  
397 transposable elements) are preferentially enriched for sites of R-loop  
398 formation, TEC arrest and transcription-replication conflict. Loss of the  
399 proteins Rho or NusG, that are involved in factor-dependent transcription  
400 termination and reportedly in R-loop avoidance (31, 69, 83-85), is also better  
401 tolerated in MDS42 than in MG1655, and especially so in presence of *rpoB*\*35  
402 (65, 69, 86).

403 Finally, why does ectopic expression of the R-loop helicase UvsW not  
404 rescue *topA* lethality, although it can rescue the lethality associated with  
405 loss of RNase H enzymes, RecG, Rho or NusG (69, 75)? One possibility is that  
406 R-loop formation in Topo I-deficient strains is a consequence, and not cause,  
407 of RNAP backtracking and arrest, so that R-loop removal per se would not  
408 mitigate the primary problem. An alternative possibility is that Topo I itself is  
409 required to relax the negative supercoils arising from UvsW's helicase action  
410 on R-loops, and hence that UvsW is unable to act efficiently to unwind R-  
411 loops specifically in the *topA* mutants. The fact that RNase HI overexpression  
412 can suppress *topA* sickness phenotypes (26, 27) lends support to the second  
413 model.

414 **Topo I deficiency and cSDR.** Drolet and coworkers had provided biochemical  
415 evidence for cSDR in Topo I-deficient cultures (28), which is presumably  
416 initiated from R-loops in these cells; our data establish that such cSDR is  
417 sufficient to sustain viability in absence of DnaA, in derivatives carrying  $\Delta tus$   
418 and *rpoB*\*35 mutations. The latter two mutations are expected to facilitate the  
419 completion of replication of the circular chromosome by forks initiated from  
420 site(s) other than *oriC* (52, 70, 77, 78). Our data also support the earlier  
421 suggestion (70) that incubation at 30° is more permissive than that at 37° or  
422 42° for rescue by cSDR of  $\Delta dnaA$  lethality.

423 Of the six different *topA* mutations that were inviable in MG1655-  
424 derived strains, it was only the *topA*-Ins480::FRT allele that could confer  
425 viability to the  $\Delta dnaA$  derivatives. As explained above, this mutation generates  
426 a modified version of Topo I in which a 27 amino acid-linker is inserted

427 between residues 480 and 481 of the polypeptide. From the Topo I monomer  
428 crystal structure (87, 88), it is expected that the linker is situated at or near  
429 the junction between residues that comprise domain D2 and those that  
430 comprise domain D4; it is therefore possible that the linker may allow for (the  
431 albeit inefficient) folding of the polypeptide to yield a correct tertiary structure.  
432 The residual Topo I activity of this protein might be needed for proper  
433 chromosome segregation after cSDR in the  $\Delta dnaA$  mutants (20).

#### 434 ***oriC*-initiated replication contributes to *topA-rnhA* synthetic lethality.**

435 We have shown that although the  $\Delta topA$  and  $\Delta rnhA$  combination is  
436 synthetically lethal, the  $\Delta topA \Delta rnhA \Delta dnaA$  mutant is viable. Thus, *oriC*-  
437 initiated replication is a contributor to *topA rnhA* toxicity, which suggests that  
438 it is excessive replication (sum of that from *oriC* and cSDR, the latter  
439 contributed additively by both *rnhA* and *topA*) which confers toxicity. These  
440 results are in agreement with those from Drolet and coworkers (20, 29), who  
441 had earlier reported that mutations affecting either replication from *oriC* or  
442 replication restart functions can alleviate the sickness of cells deficient for  
443 both Topo I and RNase HI activities.

#### 444 **Materials and Methods**

445 **Growth media, bacterial strains and plasmids.** The rich and defined growth  
446 media were, respectively, LB and minimal A with 0.2% glucose (89) and,  
447 unless otherwise indicated, the growth temperature was 37°.   
448 Supplementation with Xgal and with antibiotics ampicillin, kanamycin (Kan),  
449 tetracycline (Tet), chloramphenicol (Cm), and trimethoprim (Tp) were at the  
450 concentrations described earlier (90). Isopropyl- $\beta$ -D-thiogalactoside (IPTG)  
451 was added at the indicated concentrations. *E. coli* strains used are listed in  
452 Table S1, in the supplemental material.

453 Plasmids described earlier include pMU575 (Tp<sup>R</sup>, single-copy-number  
454 vector with *lacZ*<sup>+</sup>) (68); pACYC184 (Tet<sup>R</sup> Cm<sup>R</sup>, p15A replicon) (73); pHYD2388  
455 (70) and pHYD2411 (69) (Tp<sup>R</sup>, pMU575 derivatives with, respectively, *dnaA*<sup>+</sup>  
456 and *rho*<sup>+</sup>); and pKD13, pKD46 and pCP20 described by Datsenko and Wanner  
457 (66) for recombineering experiments and Flp-recombinase catalyzed excision  
458 between a pair of FRT sites. The construction of two derivatives of plasmid



459 pMU575 is described in the supplemental material: pHYD2382, carrying  
460 *topA*<sup>+</sup>, and pHYD2390, carrying *topA*<sup>+</sup> *dnaA*<sup>+</sup>.

461 **Blue-white screening assays.** To determine lethality or viability of strains  
462 with chromosomal *topA* or *dnaA* mutations, derivatives carrying the shelter  
463 plasmids pHYD2382 (*topA*<sup>+</sup>) or pHYD2390 (*topA*<sup>+</sup> *dnaA*<sup>+</sup>) were grown overnight  
464 in Tp-supplemented medium, subcultured into medium without Tp for growth  
465 to mid-exponential phase, and plated at suitable dilutions on Xgal plates  
466 without Tp. The percentage of white colonies to total was determined  
467 (minimum of 500 colonies counted), and representative images were captured.

468 **Plasmid supercoiling assays.** Strains carrying plasmid pACYC184 were  
469 grown in LB to mid-exponential phase, and plasmid preparations were made  
470 with the aid of a commercial kit. Plasmid supercoiling status in each of the  
471 preparations was determined essentially as described (72), following  
472 electrophoresis on 1% agarose gel with 5 µg/ml chloroquine at 3 V/cm for 17  
473 hr.

474 **Copy number analysis by deep sequencing.** Copy number determinations  
475 of the various genomic regions were performed essentially as described (70).  
476 Genomic DNA was extracted by the phenol-chloroform method from cultures  
477 grown in LB to mid-exponential phase, and single-end deep sequencing was  
478 performed on Illumina platforms to achieve around 100-fold coverage for each  
479 preparation. Sequence reads were aligned to the MDS42 reference genome  
480 (Accession number NC\_020518.1), and copy numbers were then determined  
481 by a moving-average method after normalization of the base read count for  
482 each region to the aggregate of aligned base read counts for that culture.

483 **Other methods.** Procedures were as described for P1 transduction (91) and  
484 for recombinant DNA manipulations, PCR, and transformation (92). Different  
485 chromosomal *topA* mutations were generated by recombineering (66) as  
486 described in the supplemental material. For microscopy experiments, cells  
487 from cultures grown in LB to mid-exponential phase were immobilized on 1%  
488 agarose pads and visualized by differential interference contrast imaging with  
489 the aid of a Zeiss Axio Imager Z2 microscope.

490 **Data availability.** Genome sequence data from this work have been

491 submitted under Accession number PRJNA670792 and are available for  
492 public access at <https://www.ncbi.nlm.nih.gov/Traces/study/?acc=PRJNA670792> .

### 493 **Supplemental material**

494 Supplemental material is provided as a PDF file “Supplemental File 1”.

### 495 **Acknowledgements**

496 We thank Jillella Mallikarjun for sequencing the *dnaA177* allele; Aswin  
497 Seshasayee and T V Reshma for help with deep sequencing; V Balaji for  
498 assistance with microscopy; and the COE team members for advice and  
499 discussions.

500 This work was supported by Government of India funds from (i) DBT  
501 Centre of Excellence (COE) project for Microbial Biology – Phase 2, (ii) SERB  
502 project CRG/2018/000348, and (iii) DBT project  
503 BT/PR34340/BRB/10/1815/2019. JG was recipient of the J C Bose  
504 fellowship and INSA Senior Scientist award.

505 We declare that there are no conflicts of interest.

### 506 **References**

- 507 1. Vos SM, Tretter EM, Schmidt BH, Berger JM. 2011. All tangled up: how  
508 cells direct, manage and exploit topoisomerase function. *Nat Rev Mol*  
509 *Cell Biol* 12:827–841.
- 510 2. Chen SH, Chan NL, Hsieh TS. 2013. New mechanistic and functional  
511 insights into DNA topoisomerases. *Annu Rev Biochem* 82:139–170.
- 512 3. Bush NG, Evans-Roberts K, Maxwell A. 2015. DNA topoisomerases.  
513 *EcoSal Plus* doi:10.1128/ecosalplus.ESP-0010-2014.
- 514 4. Brochu J, Breton E V, Drolet M. 2020. Supercoiling, R-loops, Replication  
515 and the Functions of Bacterial Type 1A Topoisomerases. *Genes* 11:pli-  
516 E249.
- 517 5. Liu LF, Wang JC. 1987. Supercoiling of the DNA template during  
518 transcription. *Proc Natl Acad Sci U S A* 84:7024–7027.
- 519 6. Dorman CJ. 2019. DNA supercoiling and transcription in bacteria: a  
520 two-way street. *BMC Mol cell Biol* 20:26.
- 521 7. Sternglanz R, DiNardo S, Voelkel KA, Nishimura Y, Hirota Y, Becherer

- 522 K, Zumstein L, Wang JC. 1981. Mutations in the gene coding for  
523 *Escherichia coli* DNA topoisomerase I affect transcription and  
524 transposition. Proc Natl Acad Sci U S A 78:2747–2751.
- 525 8. Richardson SM, Higgins CF, Lilley DM. 1984. The genetic control of DNA  
526 supercoiling in *Salmonella typhimurium*. EMBO J 3:1745–1752.
- 527 9. Ni Bhriain N, Dorman CJ. 1993. Isolation and characterization of a *topA*  
528 mutant of *Shigella flexneri*. Mol Microbiol 7:351–358.
- 529 10. McNairn E, Ni Bhriain N, Dorman CJ. 1995. Overexpression of the  
530 *Shigella flexneri* genes coding for DNA topoisomerase IV compensates for  
531 loss of DNA topoisomerase I: effect on virulence gene expression. Mol  
532 Microbiol 15:507–517.
- 533 11. Reddy M, Gowrishankar J. 1997. Identification and characterization of  
534 *ssb* and *uup* mutants with increased frequency of precise excision of  
535 transposon Tn10 derivatives: nucleotide sequence of *uup* in *Escherichia*  
536 *coli*. J Bacteriol 179:2892–2899.
- 537 12. Stupina VA, Wang JC. 2005. Viability of *Escherichia coli topA* mutants  
538 lacking DNA topoisomerase I. J Biol Chem 280:355–360.
- 539 13. Stockum A, Lloyd RG, Rudolph CJ. 2012. On the viability of *Escherichia*  
540 *coli* cells lacking DNA topoisomerase I. BMC Microbiol 12:26.
- 541 14. DiNardo S, Voelkel KA, Sternglanz R, Reynolds AE, Wright A. 1982.  
542 *Escherichia coli* DNA topoisomerase I mutants have compensatory  
543 mutations in DNA gyrase genes. Cell 31:43–51.
- 544 15. Pruss GJ, Manes SH, Drlica K. 1982. *Escherichia coli* DNA  
545 topoisomerase I mutants: increased supercoiling is corrected by  
546 mutations near gyrase genes. Cell 31:35–42.
- 547 16. Raji A, Zabel DJ, Laufer CS, Depew RE. 1985. Genetic analysis of  
548 mutations that compensate for loss of *Escherichia coli* DNA  
549 topoisomerase I. J Bacteriol 162:1173–1179.
- 550 17. Zhu Q, Pongpech P, DiGate RJ. 2001. Type I topoisomerase activity is  
551 required for proper chromosomal segregation in *Escherichia coli*. Proc  
552 Natl Acad Sci U S A 98:9766–9771.
- 553 18. Broccoli S, Phoenix P, Drolet M. 2000. Isolation of the *topB* gene  
554 encoding DNA topoisomerase III as a multicopy suppressor of *topA* null

- 555 mutations in *Escherichia coli*. Mol Microbiol 35:58–68.
- 556 19. Brochu J, Vlachos-Breton E, Sutherland S, Martel M, Drolet M. 2018.  
557 Topoisomerases I and III inhibit R-loop formation to prevent unregulated  
558 replication in the chromosomal Ter region of *Escherichia coli*. PLoS Genet  
559 14:e1007668.
- 560 20. Usongo V, Drolet M. 2014. Roles of type 1A topoisomerases in genome  
561 maintenance in *Escherichia coli*. PLoS Genet 10:e1004543.
- 562 21. Drolet M, Bi X, Liu LF. 1994. Hypernegative supercoiling of the DNA  
563 template during transcription elongation *in vitro*. J Biol Chem 269:2068–  
564 2074.
- 565 22. Masse E, Phoenix P, Drolet M. 1997. DNA topoisomerases regulate R-  
566 loop formation during transcription of the *rrmB* operon in *Escherichia*  
567 *coli*. J Biol Chem 272:12816–12823.
- 568 23. Masse E, Drolet M. 1999. *Escherichia coli* DNA topoisomerase I inhibits  
569 R-loop formation by relaxing transcription-induced negative  
570 supercoiling. J Biol Chem 274:16659–16664.
- 571 24. Drolet M. 2006. Growth inhibition mediated by excess negative  
572 supercoiling: the interplay between transcription elongation, R-loop  
573 formation and DNA topology. Mol Microbiol 59:723–730.
- 574 25. Belotserkovskii BP, Tornaletti S, D’Souza AD, Hanawalt PC. 2018. R-  
575 loop generation during transcription: Formation, processing and cellular  
576 outcomes. DNA Repair (Amst) 71:69–81.
- 577 26. Drolet M, Phoenix P, Menzel R, Masse E, Liu LF, Crouch RJ. 1995.  
578 Overexpression of RNase H partially complements the growth defect of  
579 an *Escherichia coli* delta *topA* mutant: R-loop formation is a major  
580 problem in the absence of DNA topoisomerase I. Proc Natl Acad Sci U S  
581 A 92:3526–3530.
- 582 27. Masse E, Drolet M. 1999. R-loop-dependent hypernegative supercoiling  
583 in *Escherichia coli topA* mutants preferentially occurs at low  
584 temperatures and correlates with growth inhibition. J Mol Biol 294:321–  
585 332.
- 586 28. Martel M, Balleydier A, Sauriol A, Drolet M. 2015. Constitutive stable  
587 DNA replication in *Escherichia coli* cells lacking type 1A topoisomerase

- 588 activity. *DNA Repair (Amst)* 35:37–47.
- 589 29. Usongo V, Martel M, Balleydier A, Drolet M. 2016. Mutations reducing  
590 replication from R-loops suppress the defects of growth, chromosome  
591 segregation and DNA supercoiling in cells lacking topoisomerase I and  
592 RNase HI activity. *DNA Repair (Amst)* 40:1–17.
- 593 30. Hraiky C, Raymond MA, Drolet M. 2000. RNase H overproduction  
594 corrects a defect at the level of transcription elongation during rRNA  
595 synthesis in the absence of DNA topoisomerase I in *Escherichia coli*. *J*  
596 *Biol Chem* 275:11257–11263.
- 597 31. Raghunathan N, Kapshikar RM, Leela JK, Mallikarjun J, Bouloc P,  
598 Gowrishankar J. 2018. Genome-wide relationship between R-loop  
599 formation and antisense transcription in *Escherichia coli*. *Nucleic Acids*  
600 *Res* 46:3400–3411.
- 601 32. Gan W, Guan Z, Liu J, Gui T, Shen K, Manley JL, Li X. 2011. R-loop-  
602 mediated genomic instability is caused by impairment of replication fork  
603 progression. *Genes Dev* 25:2041–2056.
- 604 33. Gómez-González B, Aguilera A. 2019. Transcription-mediated  
605 replication hindrance: A major driver of genome instability. *Genes Dev.*  
606 33:1008–1026.
- 607 34. Garcia-Muse T, Aguilera A. 2019. R Loops: From Physiological to  
608 Pathological Roles. *Cell* 179:604–618.
- 609 35. Ivanov IE, Wright A V, Cofsky JC, Aris KDP, Doudna JA, Bryant Z. 2020.  
610 Cas9 interrogates DNA in discrete steps modulated by mismatches and  
611 supercoiling. *Proc Natl Acad Sci U S A* 117:5853–5860.
- 612 36. El Hage A, French SL, Beyer AL, Tollervey D. 2010. Loss of  
613 Topoisomerase I leads to R-loop-mediated transcriptional blocks during  
614 ribosomal RNA synthesis. *Genes Dev* 24:1546–1558.
- 615 37. Tuduri S, Crabbe L, Conti C, Tourriere H, Holtgreve-Grez H, Jauch A,  
616 Pantesco V, De Vos J, Thomas A, Theillet C, Pommier Y, Tazi J, Coquelle  
617 A, Pasero P. 2009. Topoisomerase I suppresses genomic instability by  
618 preventing interference between replication and transcription. *Nat Cell*  
619 *Biol* 11:1315–1324.
- 620 38. Zhang T, Wallis M, Petrovic V, Challis J, Kalitsis P, Hudson DF. 2019.

- 621 Loss of TOP3B leads to increased R-loop formation and genome  
622 instability. *Open Biol* 9:190222.
- 623 39. Boubakri H, de Septenville AL, Viguera E, Michel B. 2010. The helicases  
624 DinG, Rep and UvrD cooperate to promote replication across  
625 transcription units *in vivo*. *EMBO J* 29:145–157.
- 626 40. Dutta D, Shatalin K, Epshtein V, Gottesman ME, Nudler E. 2011.  
627 Linking RNA polymerase backtracking to genome instability in *E. coli*.  
628 *Cell* 146:533–543.
- 629 41. Lang KS, Hall AN, Merrikh CN, Ragheb M, Tabakh H, Pollock AJ,  
630 Woodward JJ, Dreifus JE, Merrikh H. 2017. Replication-transcription  
631 conflicts generate R-loops that orchestrate bacterial stress survival and  
632 pathogenesis. *Cell* 170:787-799.
- 633 42. Hamperl S, Bocek MJ, Saldivar JC, Swigut T, Cimprich KA. 2017.  
634 Transcription-replication conflict orientation modulates R-loop levels  
635 and activates distinct DNA damage responses. *Cell* 170:774-786.
- 636 43. Nudler E. 2012. RNA polymerase backtracking in gene regulation and  
637 genome instability. *Cell* 149:1438–1445.
- 638 44. Lang KS, Merrikh H. 2018. The clash of macromolecular titans:  
639 replication-transcription conflicts in bacteria. *Annu Rev Microbiol*  
640 72:71–88.
- 641 45. Kuzminov A. 2018. When DNA topology turns deadly - RNA polymerases  
642 dig in their R-loops to stand their ground: new positive and negative  
643 (super)twists in the replication-transcription conflict. *Trends Genet*  
644 34:111–120.
- 645 46. Zatreanu D, Han Z, Mitter R, Tumini E, Williams H, Gregersen L, Dirac-  
646 Svejstrup AB, Roma S, Stewart A, Aguilera A, Svejstrup JQ. 2019.  
647 Elongation factor TFIIS prevents transcription stress and R-loop  
648 accumulation to maintain genome stability. *Mol Cell* 76:57-69.
- 649 47. Itoh T, Tomizawa J. 1980. Formation of an RNA primer for initiation of  
650 replication of ColE1 DNA by ribonuclease H. *Proc Natl Acad Sci U S A*  
651 77:2450–2454.
- 652 48. Kogoma T. 1997. Stable DNA replication: interplay between DNA  
653 replication, homologous recombination, and transcription. *Microbiol*

- 654 Mol Biol Rev 61:212–238.
- 655 49. Drolet M, Brochu J. 2019. R-loop-dependent replication and genomic  
656 instability in bacteria. *DNA Repair (Amst)* 84:102693.
- 657 50. Sinha AK, Possoz C, Leach DRF. 2020. The roles of bacterial DNA  
658 double-strand break repair proteins in chromosomal DNA replication.  
659 *FEMS Microbiol Rev* 44:351–368.
- 660 51. Stuckey R, Garcia-Rodriguez N, Aguilera A, Wellinger RE. 2015. Role for  
661 RNA:DNA hybrids in origin-independent replication priming in a  
662 eukaryotic system. *Proc Natl Acad Sci U S A* 112:5779–5784.
- 663 52. Rudolph CJ, Upton AL, Stockum A, Nieduszynski CA, Lloyd RG. 2013.  
664 Avoiding chromosome pathology when replication forks collide. *Nature*  
665 500:608–611.
- 666 53. Gowrishankar J. 2015. End of the beginning: elongation and  
667 termination features of alternative modes of chromosomal replication  
668 initiation in bacteria. *PLoS Genet* 11:e1004909.
- 669 54. Tehranchi AK, Blankschien MD, Zhang Y, Halliday JA, Srivatsan A, Peng  
670 J, Herman C, Wang JD. 2010. The transcription factor DksA prevents  
671 conflicts between DNA replication and transcription machinery. *Cell*  
672 141:595–605.
- 673 55. Zhang Y, Mooney RA, Grass JA, Sivaramakrishnan P, Herman C,  
674 Landick R, Wang JD. 2014. DksA guards elongating RNA polymerase  
675 against ribosome-stalling-induced arrest. *Mol Cell* 53:766–778.
- 676 56. Myka KK, Kusters K, Washburn R, Gottesman ME. 2019. DksA-RNA  
677 polymerase interactions support new origin formation and DNA repair  
678 in *Escherichia coli*. *Mol Microbiol* 111:1382–1397.
- 679 57. Ogawa T, Pickett GG, Kogoma T, Kornberg A. 1984. RNase H confers  
680 specificity in the dnaA-dependent initiation of replication at the unique  
681 origin of the *Escherichia coli* chromosome *in vivo* and *in vitro*. *Proc Natl*  
682 *Acad Sci U S A* 81:1040–1044.
- 683 58. Kaguni JM, Kornberg A. 1984. Topoisomerase I confers specificity in  
684 enzymatic replication of the *Escherichia coli* chromosomal origin. *J Biol*  
685 *Chem* 259:8578–8583.
- 686 59. Posfai G, Plunkett 3rd G, Feher T, Frisch D, Keil GM, Umenhoffer K,

- 687 Kolisnychenko V, Stahl B, Sharma SS, de Arruda M, Burland V, Harcum  
688 SW, Blattner FR. 2006. Emergent properties of reduced-genome  
689 *Escherichia coli*. *Science* 312:1044–1046.
- 690 60. McGlynn P, Lloyd RG. 2000. Modulation of RNA polymerase by (p)ppGpp  
691 reveals a RecG-dependent mechanism for replication fork progression.  
692 *Cell* 101:35–45.
- 693 61. Trautinger BW, Lloyd RG. 2002. Modulation of DNA repair by mutations  
694 flanking the DNA channel through RNA polymerase. *EMBO J* 21:6944–  
695 6953.
- 696 62. Trautinger BW, Jaktaji RP, Rusakova E, Lloyd RG. 2005. RNA  
697 polymerase modulators and DNA repair activities resolve conflicts  
698 between DNA replication and transcription. *Mol Cell* 19:247–258.
- 699 63. Guy CP, Atkinson J, Gupta MK, Mahdi AA, Gwynn EJ, Rudolph CJ,  
700 Moon PB, van Knippenberg IC, Cadman CJ, Dillingham MS, Lloyd RG,  
701 McGlynn P. 2009. Rep provides a second motor at the replisome to  
702 promote duplication of protein-bound DNA. *Mol Cell* 36:654–666.
- 703 64. Kamarthapu V, Epshtein V, Benjamin B, Proshkin S, Mironov A, Cashel  
704 M, Nudler E. 2016. ppGpp couples transcription to DNA repair in *E. coli*.  
705 *Science* 352:993–996.
- 706 65. Washburn RS, Gottesman ME. 2011. Transcription termination  
707 maintains chromosome integrity. *Proc Natl Acad Sci U S A* 108:792–797.
- 708 66. Datsenko KA, Wanner BL. 2000. One-step inactivation of chromosomal  
709 genes in *Escherichia coli* K-12 using PCR products. *Proc Natl Acad Sci U*  
710 *S A* 97:6640–6645.
- 711 67. Baba T, Ara T, Hasegawa M, Takai Y, Okumura Y, Baba M, Datsenko  
712 KA, Tomita M, Wanner BL, Mori H. 2006. Construction of *Escherichia*  
713 *coli* K-12 in-frame, single-gene knockout mutants: the Keio collection.  
714 *Mol Syst Biol* 2:2006 0008.
- 715 68. Andrews AE, Lawley B, Pittard AJ. 1991. Mutational analysis of  
716 repression and activation of the *tyrP* gene in *Escherichia coli*. *J Bacteriol*  
717 173:5068–5078.
- 718 69. Leela JK, Syeda AH, Anupama K, Gowrishankar J. 2013. Rho-dependent  
719 transcription termination is essential to prevent excessive genome-wide



- 720 R-loops in *Escherichia coli*. Proc Natl Acad Sci U S A 110:258–263.
- 721 70. Raghunathan N, Goswami S, Leela JK, Pandiyan A, Gowrishankar J.  
722 2019. A new role for *Escherichia coli* Dam DNA methylase in prevention  
723 of aberrant chromosomal replication. Nucleic Acids Res 47:5698–5711.
- 724 71. Ali N, Gowrishankar J. 2020. Cross-subunit catalysis and a new  
725 phenomenon of recessive resurrection in *Escherichia coli* RNase E.  
726 Nucleic Acids Res 48:847–861.
- 727 72. Dattananda CS, Rajkumari K, Gowrishankar J. 1991. Multiple  
728 mechanisms contribute to osmotic inducibility of proU operon  
729 expression in *Escherichia coli*: demonstration of two osmoreponsive  
730 promoters and of a negative regulatory element within the first  
731 structural gene. J Bacteriol 173:7481–7490.
- 732 73. Chang AC, Cohen SN. 1978. Construction and characterization of  
733 amplifiable multicopy DNA cloning vehicles derived from the P15A  
734 cryptic miniplasmid. J Bacteriol 134:1141–1156.
- 735 74. Dudas KC, Kreuzer KN. 2001. UvsW Protein regulates bacteriophage T4  
736 origin-dependent replication by unwinding R-loops. Mol Cell Biol  
737 21:2706–2715.
- 738 75. Carles-Kinch K, George JW, Kreuzer KN. 1997. Bacteriophage T4 UvsW  
739 protein is a helicase involved in recombination, repair and the regulation  
740 of DNA replication origins. EMBO J 16:4142–4151.
- 741 76. Wechsler JA, Gross JD. 1971. *Escherichia coli* mutants temperature-  
742 sensitive for DNA synthesis. Mol Gen Genet 113:273–284.
- 743 77. Dimude JU, Stockum A, Midgley-Smith SL, Upton AL, Foster HA, Khan  
744 A, Saunders NJ, Retkute R, Rudolph CJ. 2015. The consequences of  
745 replicating in the wrong orientation: bacterial chromosome duplication  
746 without an active replication origin. MBio 6:e01294-15.
- 747 78. Midgley-Smith SL, Dimude JU, Rudolph CJ. 2019. A role for 3'  
748 exonucleases at the final stages of chromosome duplication in  
749 *Escherichia coli*. Nucleic Acids Res 47:1847–1860.
- 750 79. Maduike NZ, Tehranchi AK, Wang JD, Kreuzer KN. 2014. Replication of  
751 the *Escherichia coli* chromosome in RNase HI-deficient cells: multiple  
752 initiation regions and fork dynamics. Mol Microbiol 91:39–56.

- 753 80. Wendel BM, Courcelle CT, Courcelle J. 2014. Completion of DNA  
754 replication in *Escherichia coli*. Proc Natl Acad Sci U S A 111:16454–  
755 16459.
- 756 81. Wendel BM, Cole JM, Courcelle CT, Courcelle J. 2018. SbcC-SbcD and  
757 ExoI process convergent forks to complete chromosome replication. Proc  
758 Natl Acad Sci U S A 115:349–354.
- 759 82. Azeroglu B, Mawer JS, Cockram CA, White MA, Hasan AM, Filatenkova  
760 M, Leach DR. 2016. RecG Directs DNA Synthesis during Double-Strand  
761 Break Repair. PLoS Genet 12:e1005799.
- 762 83. Harinarayanan R, Gowrishankar J. 2003. Host factor titration by  
763 chromosomal R-loops as a mechanism for runaway plasmid replication  
764 in transcription termination-defective mutants of *Escherichia coli*. J Mol  
765 Biol 332:31–46.
- 766 84. Gowrishankar J, Harinarayanan R. 2004. Why is transcription coupled  
767 to translation in bacteria? Mol Microbiol 54:598–603.
- 768 85. Gowrishankar J, Leela JK, Anupama K. 2013. R-loops in bacterial  
769 transcription: their causes and consequences. Transcription 4:153–157.
- 770 86. Cardinale CJ, Washburn RS, Tadigotla VR, Brown LM, Gottesman ME  
771 NE. 2008. Termination factor Rho and its cofactors NusA and NusG  
772 silence foreign DNA in *E. coli*. Science 320:935–938.
- 773 87. Tan K, Zhou Q, Cheng B, Zhang Z, Joachimiak A, Tse-Dinh YC. 2015.  
774 Structural basis for suppression of hypernegative DNA supercoiling by  
775 *E. coli* topoisomerase I. Nucleic Acids Res 43:11031–11046.
- 776 88. Cao N, Tan K, Zuo X, Annamalai T, Tse-Dinh Y-C. 2020. Mechanistic  
777 insights from structure of *Mycobacterium smegmatis* topoisomerase I  
778 with ssDNA bound to both N- and C-terminal domains. Nucleic Acids  
779 Res 48:4448–4462.
- 780 89. Miller JH. 1992. A Short Course in Bacterial Genetics: A Laboratory  
781 Manual and Handbook for *Escherichia coli* and Related Bacteria. Cold  
782 Spring Harb Lab Press NY.
- 783 90. Anupama K, Leela JK, Gowrishankar J. 2011. Two pathways for RNase  
784 E action in *Escherichia coli* in vivo and bypass of its essentiality in  
785 mutants defective for Rho-dependent transcription termination. Mol

- 786            Microbiol 82:1330-1348.
- 787    91.    Gowrishankar J. 1985. Identification of osmoreponsive genes in  
788            *Escherichia coli*: evidence for participation of potassium and proline  
789            transport systems in osmoregulation. J Bacteriol 164:434–445.
- 790    92.    Sambrook J, Russell D. 2001. Molecular Cloning: A Laboratory Manual.  
791            3rd edn. Cold Spring Harb Lab Press NY.
- 792

793

## Legends to figures

794 **Figure 1. (A)** Representations of *topA*<sup>+</sup> ORF delineating the encoded protein's  
795 domains D1 to D9 (adapted from 87, 88), and of the constructed *topA* alleles  
796 (three pairs) wherein the interrupted line segments represent deletions and  
797 each inverted triangle represents the pair comprising either Kan<sup>R</sup> insertion  
798 (::Kan allele) or its FRT derivative (::FRT allele). **(B)** Blue-white screening assay  
799 on LB medium, of MG1655 or MDS42 strain derivatives with the *topA*<sup>+</sup> shelter  
800 plasmid pHYD2390 and the different *topA* alleles as indicated on the top of  
801 each column; the *rpoB* allele status is indicated at left of each row. Examples  
802 of white colonies are marked by the yellow arrows. From left to right, strains  
803 used for the panels were pHYD2390 derivatives of: row 1, GJ13519, GJ15603,  
804 GJ15604, GJ15688 and GJ16921; row 2, GJ16703, GJ16813, GJ16814,  
805 GJ16815 and GJ16854; row 3, GJ12134, GJ16816, GJ16817, GJ16818 and  
806 GJ18977; and row 4, GJ16819, GJ16820, GJ16821, GJ16822 and GJ17777.

807 **Figure 2.** Supercoiling status of reporter plasmid pACYC184 in *topA*<sup>+</sup> and  
808 *topA* derivatives, as determined by chloroquine-agarose gel electrophoresis.  
809 Genotypes at *topA* and *rpoB* loci are indicated on top of each lane; for *topA*,  $\Delta$   
810 and 480 refer, respectively, to  $\Delta topA::FRT$  and *topA*-Ins480::FRT. Strains for  
811 different lanes were pACYC184 derivatives of: 1, GJ12134; 2, GJ16819; 3,  
812 18976; 4, GJ18977; 5, GJ17776; 6, GJ17777; 8, GJ18601; and 9, GJ18910.  
813 Lane 7, DNA size standards.

814 **Figure 3.** Suppression of  $\Delta dnaA$  lethality by *topA*. **(A)** Blue-white screening  
815 assay at 30° on glucose-minimal A with *topA*<sup>+</sup> *dnaA*<sup>+</sup> shelter plasmid  
816 pHYD2390 in MG1655  $\Delta dnaA \Delta tus rpoB^*35$  derivatives carrying different *topA*  
817 alleles; the nature of  $\Delta dnaA$  allele (::Kan or ::FRT) and of *topA* allele are shown  
818 on top of each panel. Examples of white colonies are marked by the yellow  
819 arrows. Strains employed for the different panels were pHYD2390 derivatives  
820 of: i, GJ17786; ii, GJ17790; iii, GJ18940; iv, GJ17787; v, GJ17791; vi,  
821 GJ18941; vii, GJ17788; viii, GJ17792; and ix, GJ18942. **(B)** Serial dilution-  
822 spotting on LB and glucose-minimal A (MM) at indicated temperatures of the  
823 following derivatives of MG1655  $\Delta tus rpoB^*35$ : Nil, *topA*<sup>+</sup> *dnaA*<sup>+</sup>  
824 (GJ17784/pHYD2390); *topA*, *topA*-Ins480::FRT *dnaA*<sup>+</sup> (GJ17784); and *topA*

825 *dnaA*, *topA*-Ins480::FRT  $\Delta$ *dnaA*::FRT, that is, white colony from panel vi of  
826 Figure 4A (GJ18941).

827 **Figure 4.** Copy number analysis by deep sequencing in *topA* mutant  
828 derivatives of MDS42. In panels i to iv, relative copy numbers have been  
829 plotted as semi-log graphs for overlapping 10-kb intervals across the genome  
830 (relevant genotype of strain indicated on top of each panel); positions of *oriC*,  
831 *TerA* and *TerC/B* are marked, and the gap at around 0.3 Mbp in each of the  
832 plots corresponds to the *argF-lac* deletion present in the strains. Strains  
833 displayed in the different panels are: i, GJ12134; ii, GJ16819; iii, GJ18977;  
834 and iv, GJ17777.

835 **Figure 5.** Synthetic *topA rnhA* lethality, suppressed by  $\Delta$ *dnaA*. Blue-white  
836 screening assay at 30° on glucose-minimal A with *topA*<sup>+</sup> *dnaA*<sup>+</sup> shelter plasmid  
837 pHYD2390 in MG1655  $\Delta$ *tus rpoB*\*35 derivatives carrying different alleles of  
838 *topA*, *rnhA* and *dnaA* as indicated on top of each panel. Strains employed for  
839 the different panels were pHYD2390 derivatives of: i, GJ17784; ii, GJ19609;  
840 iii, GJ18951; iv, GJ17783; v, GJ19608; and vi, GJ18983.

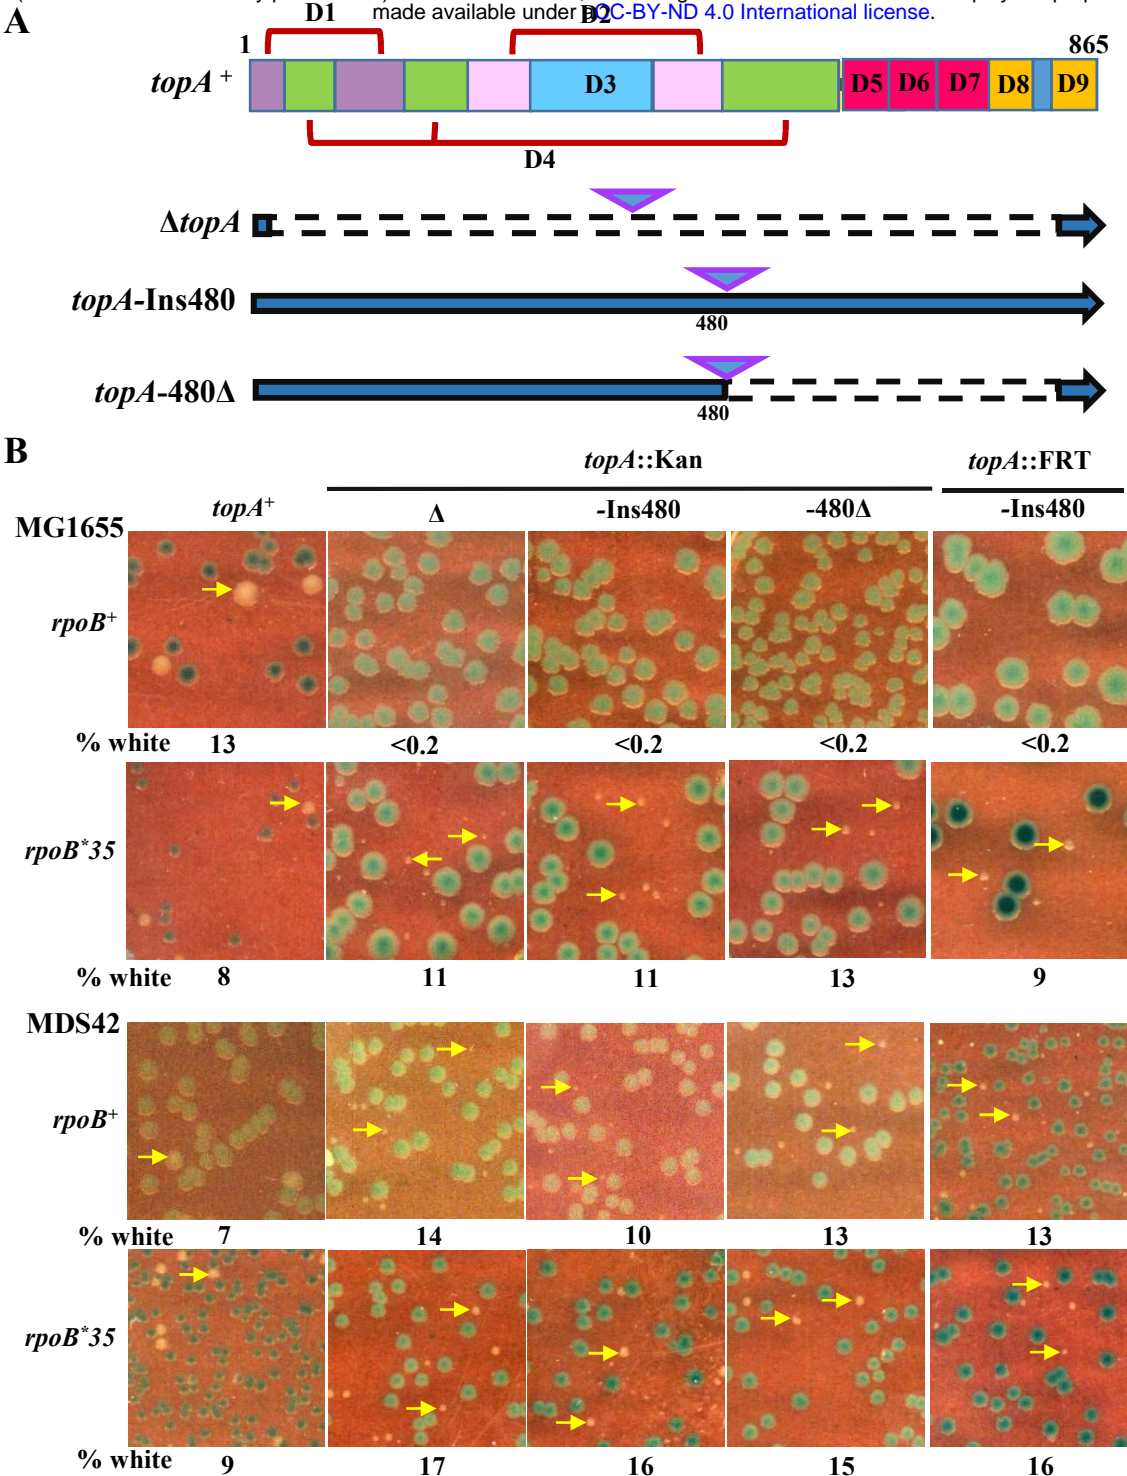

**Figure 1. (A)** Representations of *topA*<sup>+</sup> ORF delineating the encoded protein's domains D1 to D9 (adapted from 84, 85), and of the *topA* alleles (three pairs) constructed in this study wherein the interrupted line segments represent deletions and each inverted triangle represents the pair comprising either Kan<sup>R</sup> insertion (::Kan allele) or its FRT derivative (::FRT allele). **(B)** Blue-white screening assay on LB medium, of MG1655 or MDS42 strain derivatives with the *topA*<sup>+</sup> shelter plasmid pHYD2390 and the different *topA* alleles as indicated on the top of each column; the *rpoB* allele status is indicated at left of each row. Examples of white colonies are marked by the yellow arrows. From left to right, strains used for the panels were pHYD2390 derivatives of: row 1, GJ13519, GJ15603, GJ15604, GJ15688 and GJ16921; row 2, GJ16703, GJ16813, GJ16814, GJ16815 and GJ16854; row 3, GJ12134, GJ16816, GJ16817, GJ16818 and GJ18977; and row 4, GJ16819, GJ16820, GJ16821, GJ16822 and GJ17777.

**Fig. 2**

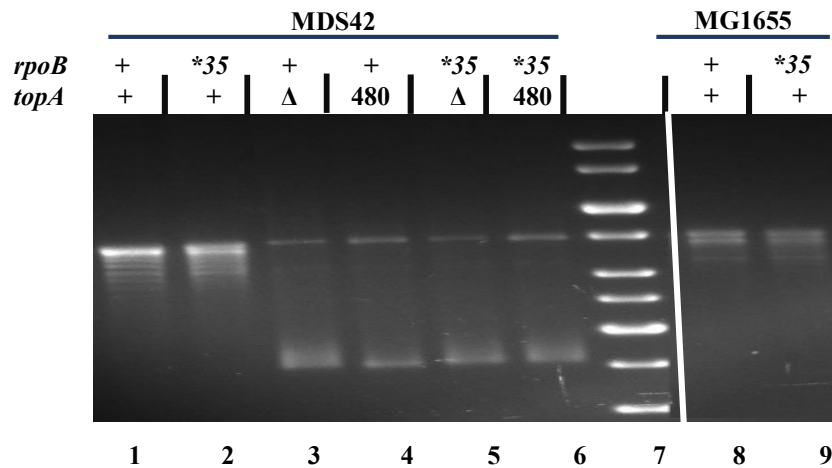

**Figure 2.** Supercoiling status of reporter plasmid pACYC184 in *topA*<sup>+</sup> and *topA* derivatives, as determined by chloroquine-agarose gel electrophoresis. Genotypes at *topA* and *rpoB* loci are indicated on top of each lane; for *topA*, Δ and 480 refer, respectively, to  $\Delta topA::FRT$  and *topA*-Ins480::FRT. Strains for different lanes were pACYC184 derivatives of: 1, GJ12134; 2, GJ16819; 3, 18976; 4, GJ18977; 5, GJ17776; 6, GJ17777; 8, GJ18601; and 9, GJ18910. Lane 7, DNA size standards.

**Fig. 3**

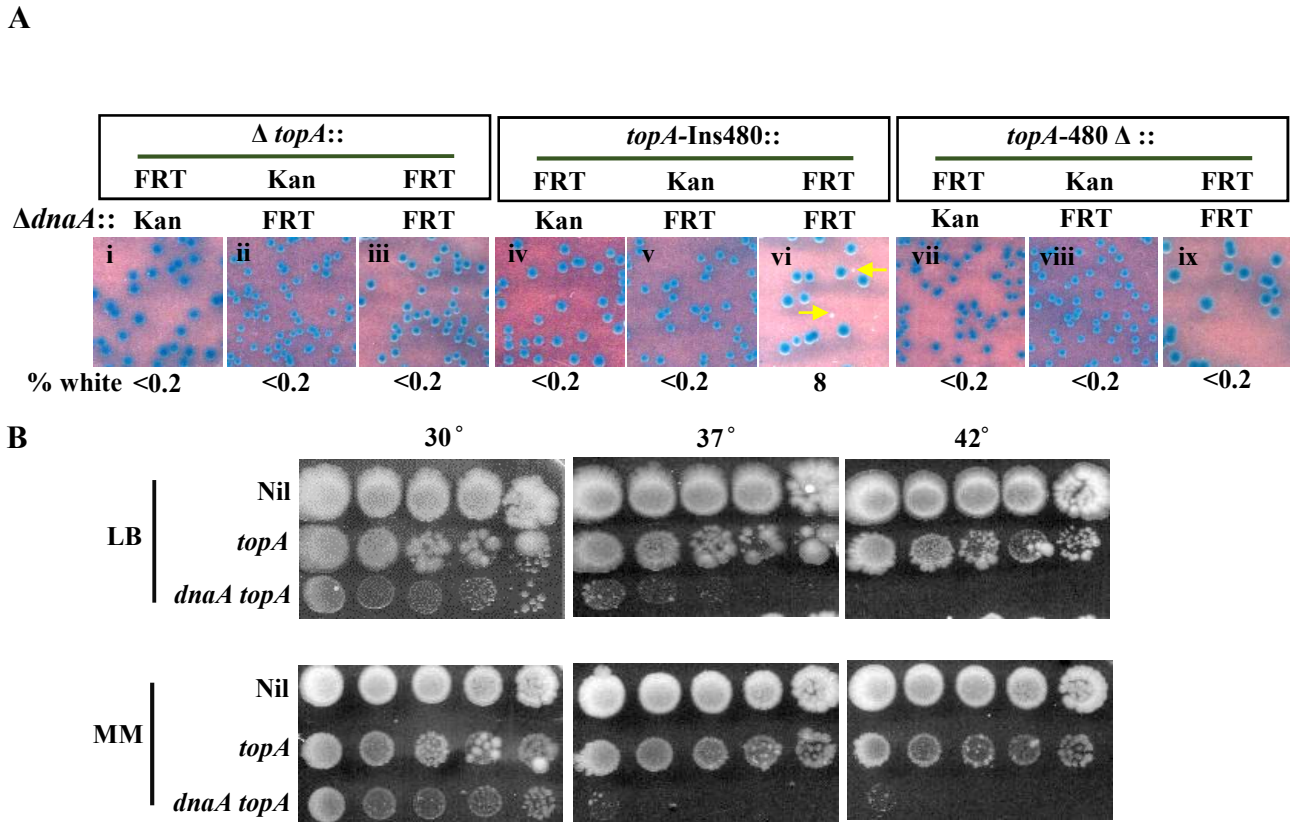

**Figure 3.** Suppression of  $\Delta dnaA$  lethality by *topA*. **(A)** Blue-white screening assay at 30° on glucose-minimal A with *topA*<sup>+</sup> *dnaA*<sup>+</sup> shelter plasmid pHYD2390 in MG1655  $\Delta dnaA \Delta tus rpoB^*35$  derivatives carrying different *topA* alleles; the nature of  $\Delta dnaA$  allele (::Kan or ::FRT) and of *topA* allele are shown on top of each panel. Examples of white colonies are marked by the yellow arrows. Strains employed for the different panels were pHYD2390 derivatives of: i, GJ17786; ii, GJ17790; iii, GJ18940; iv, GJ17787; v, GJ17791; vi, GJ18941; vii, GJ17788; viii, GJ17792; and ix, GJ18942. **(B)** Serial dilution-spotting on LB and glucose-minimal A (MM) at indicated temperatures of the following derivatives of MG1655  $\Delta tus rpoB^*35$ : Nil, *topA*<sup>+</sup> *dnaA*<sup>+</sup> (GJ17784/pHYD2390); *topA*, *topA*-Ins480::FRT *dnaA*<sup>+</sup> (GJ17784); and *topA dnaA*, *topA*-Ins480::FRT  $\Delta dnaA$ ::FRT, that is, white colony from panel vi of Figure 4A (GJ18941).



**Fig. 4**

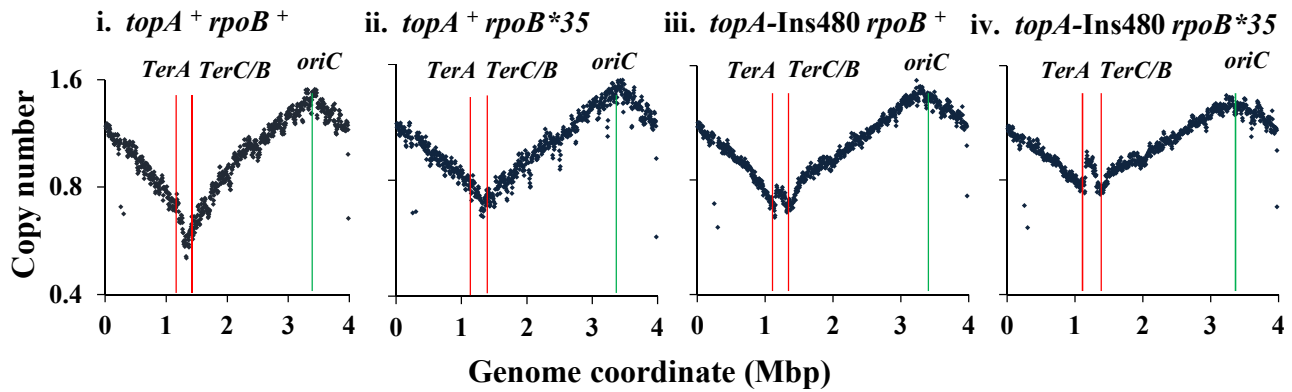

**Figure 4.** Copy number analysis by deep sequencing in *topA* mutant derivatives of MDS42. In panels i to iv, relative copy numbers have been plotted as semi-log graphs for overlapping 10-kb intervals across the genome (relevant genotypes of strain indicated on top of each panel); positions of *oriC*, *TerA* and *TerC/B* are marked, and the gap at around 0.3 Mbp in each of the plots corresponds to the *argF-lac* deletion present in the strains. Strains displayed in the different panels are: i, GJ12134; ii, GJ16819; iii, GJ18977; and iv, GJ17777.

**Fig. 5**

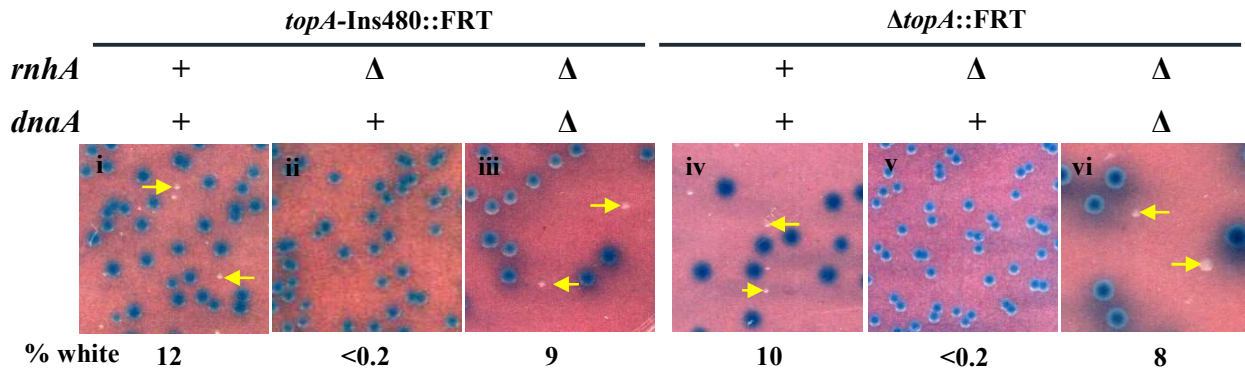

**Figure 5.** Synthetic *topA rnhA* lethality, suppressed by  $\Delta$ *dnaA*. Blue-white screening assay at 30° on glucose-minimal A with *topA*<sup>+</sup> *dnaA*<sup>+</sup> shelter plasmid pHYD2390 in MG1655  $\Delta$ *tus rpoB*\*35 derivatives carrying different alleles of *topA*, *rnhA* and *dnaA* as indicated on top of each panel. Strains employed for the different panels were pHYD2390 derivatives of: i, GJ17784; ii, GJ19609; iii, GJ18951; iv, GJ17783; v, GJ19608; and vi, GJ18983.
